# Supplementary material for: Emergence and spread of a SARS-CoV-2 lineage A variant (A.23.1) with altered spike protein in Uganda
Source: PubMed Central journal article supplement (PMC8318884; doi:10.1038/s41564-021-00933-9), 2021-06-23
Supplement: 41564_2021_933_MOESM1_ESM.pdf [file 41564_2021_933_MOESM1_ESM.pdf]

**Supplementary information**

---

**Emergence and spread of a SARS-CoV-2 lineage A variant (A.23.1) with altered spike protein in Uganda**

---

In the format provided by the authors and unedited

**Supplementary Table 1.** Summary of replacements in the A.23.1 and 3 VOC lineages<sup>1</sup>.

| Lineage   | nsp2      | nsp3        | nsp5      | nsp6                 | nsp12       | spike                     | ORF3a        | ORF4 E | ORF8       | ORF9 N  |
|-----------|-----------|-------------|-----------|----------------------|-------------|---------------------------|--------------|--------|------------|---------|
| A.23.1    |           | nsp3_E95K   |           | nsp6_M86I            |             | S_R102I                   |              |        | ORF 8_L84S | N_S202N |
| A.23.1    |           |             |           | nsp6_L98F            |             | S_F157L                   |              |        | ORF 8_E92K | N_Q418H |
| A.23.1    |           |             |           | nsp6_M183I           |             | S_V367F                   |              |        |            |         |
| A.23.1    |           |             |           |                      |             | S_Q613H                   |              |        |            |         |
| A.23.1    |           |             |           |                      |             | S_P681R                   |              |        |            |         |
| B.1.1.7   |           | nsp3_T183I  |           | nsp6_del_11288_11296 | nsp12_P323L | S_N501Y                   |              |        | ORF 8_Q27* | N_D3L   |
| B.1.1.7   |           | nsp3_A890D  |           |                      |             | S_A570D                   |              |        | ORF 8_R52I | N_G204R |
| B.1.1.7   |           | nsp3_I1412T |           |                      |             | S_D614G                   |              |        | ORF 8_Y73C | N_R203K |
| B.1.1.7   |           |             |           |                      |             | S_P681H                   |              |        |            | N_S235F |
| B.1.1.7   |           |             |           |                      |             | S_T716I                   |              |        |            |         |
| B.1.1.7   |           |             |           |                      |             | S_S982A                   |              |        |            |         |
| B.1.1.7   |           |             |           |                      |             | S_D1118H                  |              |        |            |         |
| B.1.1.7   |           |             |           |                      |             | S_del_21765_21770         |              |        |            |         |
| B.1.1.7   |           |             |           |                      |             | S_del_21991_21993         |              |        |            |         |
| B.1.351   | nsp2_T85I | nsp3_K837N  | nsp5_K90R | nsp6_del_11288_11296 | nsp12_P323L | S_D80A                    | ORF 3a_Q57H  | E_P71L |            | N_T205I |
| B.1.351   |           |             |           |                      |             | S_D215G                   |              |        |            |         |
| B.1.351   |           |             |           |                      |             | S_K417N                   |              |        |            |         |
| B.1.351   |           |             |           |                      |             | S_E484K                   |              |        |            |         |
| B.1.351   |           |             |           |                      |             | S_N501Y                   |              |        |            |         |
| B.1.351   |           |             |           |                      |             | S_D614G                   |              |        |            |         |
| B.1.351   |           |             |           |                      |             | S_A701V                   |              |        |            |         |
| B.1.351   |           |             |           |                      |             | S_non_cod_del_22281_22289 |              |        |            |         |
| B.1.281.1 |           | nsp3_S370L  |           | nsp6_del_11288_11296 | nsp12_P323L | S_L18F                    | ORF 3a_S253P |        | ORF 8_E92K | N_P80R  |
| B.1.281.1 |           | nsp3_K977Q  |           |                      |             | S_T20N                    |              |        |            | N_R203K |
| B.1.281.1 |           |             |           |                      |             | S_P26S                    |              |        |            | N_G204R |
| B.1.281.1 |           |             |           |                      |             | S_D138Y                   |              |        |            |         |
| B.1.281.1 |           |             |           |                      |             | S_R190S                   |              |        |            |         |
| B.1.281.1 |           |             |           |                      |             | S_K417T                   |              |        |            |         |
| B.1.281.1 |           |             |           |                      |             | S_E484K                   |              |        |            |         |
| B.1.281.1 |           |             |           |                      |             | S_N501Y                   |              |        |            |         |
| B.1.281.1 |           |             |           |                      |             | S_D614G                   |              |        |            |         |
| B.1.281.1 |           |             |           |                      |             | S_H655Y                   |              |        |            |         |
| B.1.281.1 |           |             |           |                      |             | S_T1027I                  |              |        |            |         |
| B.1.281.1 |           |             |           |                      |             | S_V1176F                  |              |        |            |         |

1. Representative sets of each lineage (either all available gap-free full genomes (B.1.351 and B.1.281.1) or all genomes gap-free full genomes annotated as B.1.1.7 were analyzed using CoV-GLUE (2) to identify frequent amino acid replacements associated with each lineage.

Supplementary Table 2. Uganda SARS-CoV-2 cases and genome metrics<sup>1</sup>.

| District    | Total_cases | Perc_cases  | Genome_count | Perc_genomes |
|-------------|-------------|-------------|--------------|--------------|
| Kampala     | 16398       | 56.25578922 | 150          | 44.37869822  |
| Wakiso      | 2907        | 9.97289787  | 17           | 5.029585799  |
| Luwero      | 739         | 2.535249923 | 4            | 1.183431953  |
| Amuru       | 728         | 2.497512779 | 21           | 6.213017751  |
| Mbarara     | 664         | 2.277951216 | 1            | 0.295857988  |
| Tororo      | 594         | 2.037805757 | 10           | 2.958579882  |
| Masaka      | 589         | 2.02065251  | 4            | 1.183431953  |
| Kasese      | 541         | 1.855981337 | 0            | 0            |
| Jinja       | 533         | 1.828536142 | 7            | 2.071005917  |
| Gulu        | 459         | 1.574668085 | 7            | 2.071005917  |
| Kabarole    | 343         | 1.176712752 | 0            | 0            |
| Moroto      | 338         | 1.159559505 | 5            | 1.479289941  |
| Mukono      | 318         | 1.090946516 | 0            | 0            |
| Mbale       | 312         | 1.07036262  | 5            | 1.479289941  |
| Buikwe      | 298         | 1.022333528 | 1            | 0.295857988  |
| Kiryandongo | 276         | 0.94685924  | 0            | 0            |
| Pader       | 254         | 0.871384953 | 0            | 0            |
| Kitgum      | 253         | 0.867954304 | 31           | 9.171597633  |
| Soroti      | 232         | 0.795910666 | 6            | 1.775147929  |
| Kabale      | 232         | 0.795910666 | 0            | 0            |
| Lira        | 185         | 0.634670143 | 1            | 0.295857988  |
| Arua        | 152         | 0.521458712 | 6            | 1.775147929  |
| Kyotera     | 141         | 0.483721568 | 0            | 0            |
| Butaleja    | 134         | 0.459707023 | 2            | 0.591715976  |
| Namisindwa  | 133         | 0.456276373 | 3            | 0.887573964  |
| Kikuube     | 110         | 0.377371436 | 0            | 0            |

1. Percentage of total cases reported at the end of January 2021. Only districts reporting 10 or more cases in the period were included. For the same districts, the percentage of total genomes obtained are listed.

## References

1. Áine O'Toole et al. Phylogenetic Assignment of Named Global Outbreak LINEages (PANGOLIN). 2020; Available from: <https://github.com/cov-lineages/pangolin>
2. Josh B. Singer, Gifford R, Cotten M, Robertson DL. CoV-GLUE project. 2020; Available from: <http://cov-glue.cvr.gla.ac.uk/>
